# Supplementary material for: Satellite-based evaluation of AeroCom model bias in biomass burning regions
Source: Copernicus journal article supplement (doi:10.5194/acp-2022-96), 2022-02-28
Supplement: Supplementary file 1 [file Appendix_CTRL16_19_summary.xlsx]

## Sheet: Sheet1
Models	Q1: What emission inventory is used for BB? What species are emitted in BB?			Q2: What OA/OC ratio is assumed for BB sources?			Q3: Assumed size (distribution) of the emitted OA and BC for BB particles			Q4: What fire injection height (emission altitude) is assumed for BB aerosols?			Q5: What biogenic emission is used in your model? Is it from a online calculation or prescribed input?			Q6: Source of the meteorology to be nudged to (e.g., reanalysis, prescribed input, free online calculation).		Q7: Which mixing is assumed for BB aerosols (Maxwell/Garnet, Volume mixing, core shell, external)?			Q8: How is the wet growth calculated for BB aerosols?			Q9: Which humidity is used for the radiative transfer calculations ?			Q10: Is SOA considered in your model? Which SOA formation processes are considered? (e.g., oxidation of isoprene, toluene)			Q11: What is the complex refractive index of each specie (BC, OA, SO4, DU, SS) at 550nm? Format: n+ki		Q11: What's the complex refractive index of each species (BC, OC, SO4, DU, SS) at 550nm	Please provide reference(s) for the optical property calculation in the specified version of models if possible.
	CTRL2019	CTRL2016	Any difference among regions?	CTRL2019	CTRL2016	Any difference among regions? Any difference between BB and anthropogenic aerosols?	CTRL2019	CTRL2016	Any difference among regions? Any difference between BB and anthropogenic aerosols?	CTRL2019	CTRL2016	Any difference among regions?	CTRL2019	CTRL2016	Any difference among regions?	CTRL2019	CTRL2016	CTRL2019	CTRL2016	Any difference among regions?	CTRL2019	CTRL2016	Any difference among regions?	CTRL2019	CTRL2016	Any difference among regions?	CTRL2019	CTRL2016	Any difference among regions?	CTRL2019	CTRL2016	Any difference among regions? Any difference between BB and anthropogenic aerosols?
CAM5-ATRAS	CMIP6			1.4		No	log-normal distribution with the mass median diameter of 100 nm		log-normal distribution with the mass median diameter of 70 nm for anthropogenic aerosols	0-5 km		maximum height based on Dentener et al., 2006 https://doi.org/10.5194/acp-6-4321-2006, 2006	Prescribed emissions based on MEGAN2 (Lamarque et al., 2012; Liu et al., 2012) https://doi.org/10.5194/gmd-5-369-2012 https://doi.org/10.5194/gmd-5-709-2012		No	MERRA2		Core-shell for internally-mixed BC particles; Volume mixing for pure BC and BC free particles.		No	Kappa-Kohler theory		No	RH of the cloud free area		No	VBS approach (oxidation of isoprene, monoterpenes, toluene, high-alkanes, high-alkenes, and primary semivolatile and intermediate volatility organic compounds)		No	BC: 1.950 + 0.790i OA: 1.530 + 5.665e-3i SO4, NH4, NO3: 1.430 + 1e-8i DU: 1.513 + 2.074e-3i SS: 1.500 + 1.184e-8i		No	Matsui, H. (2017), Development of a global aerosol model using a two-dimensional sectional method: 1. Model design, J. Adv. Model. Earth Syst., 9, 1921–1947, doi:10.1002/2017MS000936. Matsui, H., and N. Mahowald (2017), Development of a global aerosol model using a two-dimensional sectional method: 2. Evaluation and sensitivity simulations, J. Adv. Model. Earth Syst., 9, 1887–1920, doi:10.1002/20…
CAM6-Nor (CTRL2019)/CAM5.3-Oslo (CTRL2016)	CMIP6 (BC, OC, SO2), year 2010	CMIP5 (BC, OC, SO2), year 2000	no	2.6	2.6	1.4 for anthropogenic sources	lognormal distribution with mode radius of 40 nm and sigma of 1.8 for dry particle as internal mixture of BC and OM	lognormal distribution with mode radius of 40 nm and sigma of 1.8 for dry particle as internal mixture of BC and OM	anthropogenic BC is emitted in externally mixed mode with median radius of 24 nm (sigma 1.8) and 63 nm (sigma 1.6) anthropogenic OM is emitted in same mode as biomass burning (with median radius of 40 nm)	Followed Dentener et al. [2006] : 0-100m for agricultural waste burning; 0-100m for peat fire; 0-1km for savanna, grassland, and shrubland fire ; 0-1 km for deforestation fire; 0-2 km for temperate forest fire; 0-3 km for boreal forest fire	Profiles based on file GFED_average_1997-2002_POM/SO2/BC.nc suggested earlier by AeroCOM. Profiles follow probably approach of Dentener et al. [2006].	yes	Online calculated emissions of isoprene and monoterpenes by MEGAN2.1 in land model CLM5 (which is the landmodel coupled to the atmosphere)	Online calculated emissions of isoprene and monoterpenes by MEGAN2.1 in land model CLM5 (which is the landmodel coupled to the atmosphere)	yes, depend on PFT maps and vegetation cover	u,v,ps nudged to ERA Interim reanalysis	u,v,ps nudged to ERA Interim reanalysis	Internal and external mixing. Maxwell-Garnett is used for calculation of refractive index of internal mixing of BC with other components, otherwise volume mixing.	Internal and external mixing. Maxwell-Garnett is used for calculation of refractive index of internal mixing of BC with other components, otherwise volume mixing.	No	Based on Kohler theory, using volume mixed hygroscoicity for internal mixtures. No sub-grid variability, except for using cloud-free fraction for calculation of optics to be compared with satellite and AERONET.	Based on Kohler theory, using volume mixed hygroscoicity for internal mixtures. No sub-grid variability, except for using cloud-free fraction for calculation of optics to be compared with satellite and AERONET.	No	Clear-sky RH (assuming RH=100% in the cloudy part)	Grid-averaged RH	No	Oxidation of isoprene and monoterpenes. 5% of isoprene and 15% of monoterpenes is irreversibly assigned to the SOA mass	Oxidation of isoprene and monoterpenes. 5% of isoprene and 15% of monoterpenes is irreversibly assigned to the SOA mass	No	BC : 1.95 + 0.79i OA 1.53 + 6e-3i SO4 :1.43 + 1e-8i DU : 1.53 + 2.4e-3i SS : 1.5 + 1e-8i	BC : 1.95 + 0.79i OA 1.53 + 6e-3i SO4 :1.43 + 1e-8i DU : 1.53 + 2.4e-3i SS : 1.5 + 1e-8i		Aerotab github https://github.com/NorESMhub/NorESM/blob/noresm2/doc/configurations/AeroTab-user-guide_v16april2020.pdf (DOI: 10.13140/RG.2.2.33761.02400) Kirkevåg, A., Grini, A., Olivié, D., Seland, Ø., Alterskjær, K., Hummel, M., Karset, I. H. H., Lewinschal, A., Liu, X., Makkonen, R., Bethke, I., Griesfeller, J., Schulz, M. and Iversen, T.: A production-tagged aerosol module for earth system mo…
ECHAM6.3-HAM2.3	CMIP6 (BC, OC, SO2, DMS)	GFAS scaled with a factor 3.4 (BC, OC, SO2, DMS)	No	1.4	1.4	No	log-normal distribution with radius of average mass : BC: 0.104 μm OC: 0.104 μm, and width =1 59	log-normal distribution with radius of average mass : BC: 0.104 μm OC: 0.104 μm, and width =1 59	Radius of average mass for anthropogenic emissions: BC: 0.0414 μm OC: 0.0414 μm	75 % within the PBL (equally distributed in all levels within the PBL)-17 % in the first level above the PBL-8 % in the second level above the PBL	75 % within the PBL (equally distributed in all levels within the PBL)-17 % in the first level above the PBL-8 % in the second level above the PBL	No	Prescribed monoterpene emissions (Guenther et al., 2005)	Prescribed monoterpene emissions (Guenther et al., 2005)	No	ERA Interim reanalysis	ERA Interim reanalysis	Internal mixing. The effective refractive index of each aerosol mode is computed from volume-weighted average	Internal mixing. The effective refractive index of each aerosol mode is computed from volume-weighted average	No	Kappa-Köhler theory; volume weighted sum of individual species kappa values; RH of cloud free fraction of gridbox (assuming cloudy part is at 100% RH)	Kappa-Köhler theory; volume weighted sum of individual species kappa values; RH of cloud free fraction of gridbox (assuming cloudy part is at 100% RH)	No	RH of the cloud free part of the grid box (assuming cloudy part is at 100% RH)	RH of the cloud free part of the grid box (assuming cloudy part is at 100% RH)	No	15% of terpene is irreversibly assigned to the particle-phase OA mass	15% of terpene is irreversibly assigned to the particle-phase OA mass	No	BC: 1.850 + 0.71i OA: 1.530 + 5.5E-3i SO4: 1.432 + 1.0E-9i DU: 1.450 + 1.0E-3i SS: 1.450 + 1.0E-8i	BC: 1.850 + 0.71i OA: 1.530 + 5.5E-3i SO4: 1.432 + 1.0E-9i DU: 1.450 + 1.0E-3i SS: 1.450 + 1.0E-8i	No	Tegen, I., Neubauer, D., Ferrachat, S., Siegenthaler-Le Drian, C., Bey, I., Schutgens, N., Stier, P., Watson-Parris, D., Stanelle, T., Schmidt, H., Rast, S., Kokkola, H., Schultz, M., Schroeder, S., Daskalakis, N., Barthel, S., Heinold, B., and Lohmann, U.: The global aerosol–climate model ECHAM6.3–HAM2.3 – Part 1: Aerosol evaluation, Geosci. Model Dev., 12, 1643–1677, https://doi.org/10.5194/gmd…
ECHAM6-SALSA	CMIP6	ACCMIP II	No	1.4	1.4	No	log-normal distribution with radius of average mass : BC: 0.104 μm OC: 0.104 μm, and width =1 59	log-normal distribution with radius of average mass : BC: 0.104 μm OC: 0.104 μm, and width =1 59	Radius of average mass for anthropogenic emissions: BC: 0.0414 μm OC: 0.0414 μm	75 % within the PBL (equally distributed in all levels within the PBL)-17 % in the first level above the PBL-8 % in the second level above the PBL	75 % within the PBL (equally distributed in all levels within the PBL)-17 % in the first level above the PBL-8 % in the second level above the PBL	No	Offline terpene emissions from AEROCOM I (Dentener et al., 2006)	Offline terpene emissions from AEROCOM I (Dentener et al., 2006)	No	ERA Interim reanalysis	ERA Interim reanalysis	Internal mixing. The effective refractive index of each aerosol mode is computed from volume-weighted average	Internal mixing. The effective refractive index of each aerosol mode is computed from volume-weighted average	No	ZSR method (Zdanovskii, 1948; Stokes and Robinson, 1966); RH of cloud free fraction of gridbox (assuming cloudy part is at 100% RH)	ZSR method (Zdanovskii, 1948; Stokes and Robinson, 1966); RH of cloud free fraction of gridbox (assuming cloudy part is at 100% RH)	No	RH of the cloud free part of the grid box (assuming cloudy part is at 100% RH)	RH of the cloud free part of the grid box (assuming cloudy part is at 100% RH)	No	15% of terpene is irreversibly assigned to the particle-phase OA mass	15% of terpene is irreversibly assigned to the particle-phase OA mass	No	BC: 1.850 + 0.71i OA: 1.530 + 5.5E-3i SO4: 1.432 + 1.0E-9i DU: 1.450 + 1.0E-3i SS: 1.450 + 1.0E-8i	BC: 1.850 + 0.71i OA: 1.530 + 5.5E-3i SO4: 1.432 + 1.0E-9i DU: 1.450 + 1.0E-3i SS: 1.450 + 1.0E-8i	No	Stier, P., et al., The aerosol-climate model ECHAM5-HAM, Atmos. Chem. Phys., 5, 1125–1156, https://doi.org/10.5194/acp-5-1125-2005, 2005. Bergman, T., et al., Geosci. Model Dev., 5, 845–868, https://doi.org/10.5194/gmd-5-845-2012, Kokkola, H., et al., Geosci. Model Dev., 11, 3833–3863, https://doi.org/10.5194/gmd-11-3833-2018, 2018.
ECMWF-IFS	CMIP6	GFAS scaled with a factor 3.4 (BC, OC)	no	1.8	1.8					According to GFAS			Direct emissions of biogenic SOA from AEROCOM I (Dentener et al. 2006), as part of OM	Direct emissions of biogenic SOA from AEROCOM I (Dentener et al. 2006), as part of OM	no	ERA Interim reanalysis	ERA Interim reanalysis	External mixing	External mixing	no	Lookup tables of radius and density factor for each species over RH from 0 to 100%.	Lookup tables of radius and density factor for each species over RH from 0 to 100%.	no	Grid averaged RH	Grid averaged RH	no	Direct emissions of SOA as part of the organic matter species: from Dentener (2006) for biogenic SOA, scaled on anthropogenic CO (0.15 factor)	Direct emissions of SOA as part of the organic matter species: from Dentener (2006) for biogenic SOA, scaled on anthropogenic CO (0.15 factor)	no	BC: 1.75 + 0.45i OA: 1.5346 + 5.E-3i SO4: 1.527 + 1.0E-7i DU: 1.53 + 5.2E-3i SS: 1.51 + 1.0E-8i	BC: 1.75 + 0.45i OA: 1.5346 + 5.E-3i SO4: 1.527 + 1.0E-7i DU: 1.53 + 5.2E-3i SS: 1.51 + 1.0E-8i	no	Bozzo, A., Benedetti, A., Flemming, J., Kipling, Z., and Rémy, S.: An aerosol climatology for global models based on the tropospheric aerosol scheme in the Integrated Forecasting System of ECMWF, Geosci. Model Dev., 13, 1007–1034, https://doi.org/10.5194/gmd-13-1007-2020, 2020.
EMEP MSC-W	FINN			1.7		No	NA		No	BB emission is homegeneously distributed within PBL (appr. 2km)		No	Online calculated BVOCs (terpene, isoprene), BSOA based on VBS scheme (Simpson et al. ACP, 2012)		No	On-line; 3-hourly ECMWF IFS for 2010		External			Implicit, lookup table based on Chin et al., 2002			NA			VBS scheme for anthropogenic and biogenic SOA		No.	NA (MECs are applied to aerosol mass concentrations)			Chin et al. (2002) J. atmospheric sciences, 59(3), pp.461-483; Hess et al. (1998) Bulletin of the American meteorological society, 79(5), pp.831-844.
GEOS	CMIP6			1.8			log-normal distribution with modal radius and geometric standard deviation as 0.0118 μm and 2.0 for BC and 0.0212 μm and 2.2 for OC/BRC			BB emission is homegeneously distributed within PBL			Online calculated VOCs by MEGAN2.1 model and assuming SOA yield of 5% from isoprene and 3% from monoterpene			MERRA-2 reanalysis		External mixing			OPAC dataset			RH of the cloud free part of the grid box (assuming cloudy part is at 100% RH)			Biogenic: 5% from isopenne and 3% from monoterpene. Anthropogenic and biomass burning SOA follow the parameterization of Kim et al., (2015)			BC: 1.750 + 0.45i OA: 1.530 + 5.0E-3i SO4: 1.43 + 1.0E-9i DU: 1.530 + 7.8E-3i SS: 1.500 + 1.55E-8i			Chin, M., Ginoux, P., Kinne, S., Holben, B. N., Duncan, B. N., Martin, R. V., Logan, J. A., Higurashi, A., and Nakajima, T.: Tropospheric aerosol optical thickness from the GOCART model and comparisons with satellite and sun photometer measurements, J. Atmos. Sci., 59, 461–483, 2002; Colarco 2010, Bian 2017 Colarco, P. R., A. da Silva, M. Chin, T. Diehl (2010), Online simulations of global aeroso…
GEOS-Chem-v11-01		GFED3.1. Emitted species: BC, OC, SO2, NOx, VOC	no		2.1	no		log-normal distribution with modal radius and geometric standard deviation as 0.02 μm and 2.0 for BC and 0.063 μm and 2.0 for OA	no		Equally distributed within PBL	no		MEGAN 2.1 online model.	no		MERRA2 (reanalysis)		External mixing	No		Hygroscopicity factors are assigned in 7 RH bin for each species, and Mie scattering and absorption efficiencies recalculated at those bins, and the interpolated at ambient RH online.	no		Grid averaged RH	no		Yes. Oxidation from Terpenes, Isoprene and Anthropogenic VOCs	No		From GADS/OPAC. SO4: 1.43 + 10^-8 i; BC 1.75+0.45 i; OC 1.53+0.006 i; SS 1.5 + 10^-8 i; DU 1.56 + 0.0014 i	no	See section 3.4 of Burgos, M. A., Andrews, E., Titos, G., Benedetti, A., Bian, H., Buchard, V., Curci, G., Kipling, Z., Kirkevåg, A., Kokkola, H., Laakso, A., Letertre-Danczak, J., Lund, M. T., Matsui, H., Myhre, G., Randles, C., Schulz, M., van Noije, T., Zhang, K., Alados-Arboledas, L., Baltensperger, U., Jefferson, A., Sherman, J., Sun, J., Weingartner, E., and Zieger, P. (2020), A global mode…
GFDL-AM4	CMIP6		no	1.6		no	optical properties are calculated assuming log-normal distribution: BC: (rgeom=0.018, stdev=2); OC: (rgeom=0.085, stdev=1.492)		no	6 levels as defined by Dentener et al. "Emissions of primary aerosol and precursor gases in the years 2000 and 1750, prescribed data-sets for AeroCom." (Atm. Chem. Phys., 2006)		no	Emissions online from ocean and land with terpenes oxidation as in Dentener et al. (JGR, 2006)		no	experiment nSST is using NCEP-NCAR T62 re-analysis. Experiment fSST has no nudging		Internal mixing of BC and sulfate (using volume weighted average). All other aerosols are externally mixed.		no	BC is assumed mixed with sulfate which is growing as (NH4)2SO4 following Tang and Munkelwitz [JGR,v99(D9),1994). OC is growing as Ming and Russell (JGR, 2004)		no	Grid averaged RH		no	Biogenic SOA from terpenes oxidation as in Dentener et al. "Emissions of primary aerosol and precursor gases in the years 2000 and 1750, prescribed data-sets for AeroCom." (2006). Anthro SOA from Butane+OH (Tie et al., 2005, Assessment of the global impact of aerosols on tropospheric oxidants, J. Geophys. Res., 110, D03204, doi:10.1029/2004JD005359. )		no	BC: 1.75 + 0.55 i OC: 1.53 + 0.006 i SU: 1.53 + 1E-7 i SS: 1.49 + 1.E-8 i DU: 1.53 + 0.006 i		no	Donner et al., "The dynamical core, physical parameterizations, and basic simulation characteristics of the atmospheric component AM3 of the GFDL global coupled model CM3." Journal of Climate 24.13 (2011): 3484-3519.
GISS ModelE MATRIX	CEDS (CMIP6)		No	1.4		No	Lognormal distribution with 50nm geometric mean diameter		No	Uniformly distributed in the boundary layer, as calculated by the model		Every column at every time step has its own BL height, which is what is used.	Isoprene: online, using Guenther et al. (1995). Terpenes: Offline, using output from the ORCHIDEE model (Tsigaridis et al., 2015).		No	NCEP		Internal mixing, as calculated by the model. Multiple possible mixing states are possible, including externally mixed, particles with different coatings and classes of internally mixed particles.		No	EQSAM is used to calculate aerosol water, which is then used to calculate particle size.		No	Grid averaged RH		No	10% yield from terpenes.		No	Bauer et al 2010, doi:10.5194/acp-10-7439-2010		No	Bauer et al 2010, doi:10.5194/acp-10-7439-2010
GISS ModelE OMA	CEDS (CMIP6)		No	1.4		No	Mass-based, everything emitted in a nominal fine mode		No	Uniformly distributed in the boundary layer, as calculated by the model		Every column at every time step has its own BL height, which is what is used.	Isoprene: online, using Guenther et al. (1995). Terpenes: Offline, using output from the ORCHIDEE model (Tsigaridis et al., 2015).		No	NCEP		External mixing, with a BC absorption amplification factor of 1.5.		No	Tang and Munkelwitz (1994; doi:10.1029/94JD01345) parameterization.		No	Grid averaged RH		No	Online, from isoprene and terpenes (Tsigaridis and Kanakidou, 2007).		No	Bauer et al 2010, doi:10.5194/acp-10-7439-2010		No	Bauer et al 2020. doi:10.1029/2019MS001978
HadGEM3-GA7.1	CMIP6		No	1.4		No	log-normal distribution with modal radius and geometric standard deviation of 0.15 um and 1.59 for biomass-burning and biofuel emissions		Modal radius is 0.06 um for fossil-fuel emissions	BB emission is homegeneously distributed within PBL		No	Offline monoterpene emissions based on Spracklen et al. (2010).		No	ERA-Interim reanalysis		Internal mixing. The effective refractive index of each aerosol mode is computed from volume-weighted average		No	ZSR (Zadanovksii, 1948; Stokes and Robinson, 1966) using data from Jacobson et al. (1996) to calculate the binary electrolyte molalities.		No	RH of the cloud free part of the grid box (assuming cloudy part is at 100% RH)		No	26% of monoterpene is oxidised and condenses to form SOA on soluble particles		No	BC: 1.85 + 0.71i OA, SOA: 1.50 + 0i SO4: 1.53 + 1e-7i (except in stratosphere, where sulfuric acid is assumed: 1.43 + 1e-8) DU: 1.52 + 1.49e-3i SS: 1.55 + 1e-7i		No	Bellouin, N., Mann, G. W., Woodhouse, M. T., Johnson, C., Carslaw, K. S., & Dalvi, M. (2013). Impact of the modal aerosol scheme GLOMAP‐mode on aerosol forcing in the Hadley centre global environmental model. Atmospheric Chemistry and Physics, 13(6), 3027–3044. https://doi.org/10.5194/acp-13-3027-2013 Mulcahy, J. P., Jones, C., Sellar, A., Johnson, B., Boutle, I. A., Jones, A., et al. (2018). Imp…
IMPACT		CMIP5 (BC, OC, SO2), year 2000	No		1.4	No		log-normal distribution with modal radius and geometric standard deviation of 0.15 um and 1.4 for BC and OA from biomass-burning and biofuel emissions	No		the injection height of biomass burning emissions was specified following Dentener et al. (2006)	yes, the injection altitude profile varies with lat/lon		Online calculated VOCs by MEGAN2.1 model	No		ERA-Interim		External, but including sulfuric acid and SOA coating on BB aerosols	No		Wet growth was calculated based on the amount of sufuric acid coating on BB aerosols.	No		Grid averaged RH	No		Yes, oxidation of isoprene, a-pinene, limonene and aromatics were considered. The explicit formation mechnism of SOA refers to Lin et al. (2012, 2014) and Zhu et al. (2019).	No		BC: 1.76+0.47i OA: 1.53+1e-7i SO4:1.53+1e-7i DU:1.53+8e-3i SS:1.40+1e-7i	No
INCA	CMIP6	CMIP6		1.4	1.4	No for CTRL2016	log-normal distribution with mass mean diameter for BC: 0.14 μm OC: 0.34 μm, and both with a width(sigma) =1 59	log-normal distribution with mass mean diameter for BC: 0.14 μm OC: 0.34 μm, and both with a width(sigma) =1 59		Injection at Low Heigh of BC is 20% in insoluble mode and and 80% on soluble mode	Injection at Low Heigh of BC is 20% in insoluble mode and and 80% on soluble mode	Yes	Prescribed emissions for these simulations.	Prescribed emissions for these simulations.		ECMWF	ECMWF	BC is internally mixed using Maxwell-Garnett approximation; all other aerosols are mixed externally	We provide both: BC is internally mixed with Maxwell-Garnett; all the other aerososls are mixed externally, and simulations with BC exterinal mixing. The results of BC external mixing were used.	No	The hygroscopic growth of the aerosols particles is taken in account by: (A) Differentiate soluble and insoluble modes; (B) Details are in the reference E. Swietlicki et al, 1999 (Atmospheric Research).	The hygroscopic growth of the aerosols particles is taken in account by: (A) Differentiate soluble and insoluble modes; (B) Details are in the reference E. Swietlicki et al, 1999 (Atmospheric Research).	No	Clear Sky RH	Clear Sky RH	No	No for this simulation	No for this simulation	No	BC == 1.75 + 0.44i OA == 1.53 + 5.5e-3i SO4 = 1.43 + 1e-8i DU == 1.52 + 1.47e-3i SS == 1.5 + 1e-8i NO3==1.43+1.e-8i	BC == 1.75 + 0.44i OA == 1.53 + 5.5e-3i SO4 = 1.43 + 1e-8i DU == 1.52 + 1.47e-3i SS == 1.5 + 1e-8i NO3==1.43+1.e-8i	No	Wang, R., et al. (2016), Estimation of global black carbon direct radiative forcing and its uncertainty constrained by observations, J. Geophys. Res. Atmos., 121, 5948– 5971, doi:10.1002/2015JD024326. || Boucher O. (2015), Physical, chemical and optical aerosol properties, in Atmospheric Aerosols, pp. 25– 49, Springer, Netherlands, doi:10.1007/978-94-017-9649-1_3.
MIROC-SPRINTARS	CMIP6	GFED3.1		2.6	2.6	1.6 for anthropogenic	log-normal distribution with mode radius of 0.100 μm with SD of 1.562 for dry particle as internal mixture of OA and BC with hydroscopic growth	same as CTRL2019	a half mass of BC as external mixture with mode radius of 0.0118µm	Surface to sigma level of 0.74	same as CTRL2019		prescribed monthly mean terpene and isoprene using the GEIA database (Guenther et al. (1995)) for land vegetation online calculation for oceaic POA and SOA emissions based on Gantt et al. (2009, 2011)	same as CTRL2019		ERA5	ERA-Interim	Volume internal mixing of BC and OA	same as CTRL2019		Takemura et al. (2002, JCLI 333-352) for sulfate and OA	same as CTRL2019		Grid averaged RH	same as CTRL2019		oxidation of terpene and isoprene	same as CTRL2019		BC: 1.75 + 0.44i OA: 1.530 + 6.00E-3i SO4: 1.430 + 1.0E-8i DU: 1.53 + 2.0E-3i SS: 1.381 + 4.26E-9i	same as CTRL2019		Takemura et al., 2005, https://doi.org/10.1029/2004JD005029.
OsloTM3	CMIP6	CMIP6		2.6	2.6		Same as CTRL2016	N/A, bulk mass	No	Same as CTRL2016	Distributed over model levels (from surface up to about 500-450 hPa) according to a fractional average injection profiles based on vertical distirbution from RETRO. File can be provided if needed.	yes, the injection altitude profile varies with lat/lon	Same as CTRL2016	Prescribed input. MEGAN-MACC biogenic VOCs. (Additional natural sources: RETRO oceanic VOCs, GEIA soil NH3, oceanic source of OM.)	No	Same as CTRL2016	ECMWF OpenIFS (cycle 38)	Internal mixing of BC and OA (refractive index given for BB aerosols)			Magi and Hobbs (2003) for BB aerosols. Magi, B. I. and Hobbs, P. V.: Effects of humidity on aerosols in southern Africa during the biomass burning season, J. Geophys. Res.-Atmos., 108, 8495, https://doi.org/10.1029/2002JD002144, 2003.	Magi and Hobbs (2003) for BB aerosols. Magi, B. I. and Hobbs, P. V.: Effects of humidity on aerosols in southern Africa during the biomass burning season, J. Geophys. Res.-Atmos., 108, 8495, https://doi.org/10.1029/2002JD002144, 2003.	No	Grid averaged RH	Grid averaged RH	No	Same as CTRL2016	Yes. A two-product model (Hoffmann et al., 1997) is used to represent the oxidation products of the precursor hydrocarbons (both biogenic and anthropogenic) and their aerosol forming properties. Oxidation by OH, O3 and NO3. Partitioning between gas and aerosol phase assuming equilibrium and using partitioning coefficients primarily from Chung and Seinfeld (JGR, 2002). See also Hoyle et al. 2007 (…	No	See Questionnaire from Jonas/Michael	Same as CTRL2019	No	Myhre et al. (2007, https://onlinelibrary.wiley.com/doi/abs/10.1111/j.1600-0889.2006.00226.x) with some updates in Myhre et al. (2009, https://www.atmos-chem-phys.net/9/1365/2009/).
TM5	CMIP6 (i.e. BB4CMIP6, van Marle et al., 2017) for 2010	CMIP5 RCP4.5 for 2010	No	1.6	1.6	No	Using lognormal size distributions describing water soluble accumulation-mode particles and insoluble Aitken-mode particles. For both OA and BC, 95% of the mass is emitted in the accumulation mode, the remaining 5% in the Aitken mode. Emissions in the accumulation mode are characterized by a number median radius of 75 nm, in the Aitken mode by 30 nm. The geometeric standard deviation is 1.59 for …	Using lognormal size distributions describing water soluble accumulation-mode particles and insoluble Aitken-mode particles. For OA, 65% of the mass is emitted in the accumulation mode, the remaining 35% in the Aitken mode. BC is emitted only in the Aitken mode. Emissions in the accumulation mode are characterized by a number median radius of 75 nm, emissions in the Aitken mode by 30 nm. The geom…	No difference between regions. For CTRL2019: Biofuel emissions have the same size distribution as for open biomass burning. Emissions from other anthropogenic sources are assumed to be 100% insoluble and put in the Aitken mode. For CTRL2016: 65% of the OA mass from anthropogenic sources (here including biofuel burning) is assumed to be soluble and emitted in the soluble Aitken mode with a number …	All emissions from open biomass burning are distribution according to prescribed vertical profiles defined for forest fires (see Table A1 in van Noije et al., 2014; https://doi.org/10.5194/gmd-7-2435-2014).	Different injection heights are applied to the emissions from grassland fires and forest fires (see Table A1 in van Noije et al., 2014; https://doi.org/10.5194/gmd-7-2435-2014).	For CTRL2019: Yes, the profiles are different for high-latitude regions (poleward of 60 S/N) and the rest of the world. For high-latitude regions emissions are distributed up to 3 km and for the rest of the world up to 2 km. For CTRL2016: the same regions with corresponding injection heights are distinguished, but only for the emissions from forest fires.	van Noije et al. (2021)	van Noije et al. (2014)	No	Driven by ERA-Interim reanalysis for 2010.	Driven by ERA-Interim reanalysis for 2010.	Internal and external mixing. Effective-medium approximations are applied to calculate the refractive indices of the internally mixed modes. Sulfate (incl. MSA), ammonium-nitrate, organic aerosols, sea salt, and water are treated as homogeneous mixtures described by the Bruggeman mixing rule. When black carbon and/or dust are present in the mix, these are treated as inclusions in a homogeneous ba…	As for CTRL2019.	No	Aerosol water uptake is calculated using the clear-sky relative humidity. Subgrid variability other than the distinction between cloudy-sky and clear-sky is not taken into account. For pure sulphate-water particles the water uptake is calculated using the parameterization from Zeleznik (1991).	As for CTRL2019.	No	Aerosol water uptake and thus AOD is calculated using the clear-sky relative humidity.	As for CTRL2019.	No	Yes, SOA is calculated online and is produced by oxidation of isoprene and monoterpenes.	SOA from oxidation of monoterpenes is introduced using surrogate emissions (see van Noije et al., 2014).	No	See van Noije et al. (2021).	As for CTRL2019.	No	van Noije et al. (2014; https://doi.org/10.5194/gmd-7-2435-2014); van Noije et al. (2021; https://doi.org/10.5194/gmd-14-5637-2021).
